# Supplementary material
Source: PubMed Central journal article supplement (PMC1754456)
Supplement: annrheumd_62_3_222__1.pdf [file annrheumd_62_3_222__1.pdf]

**Table W1 Annual hip implantation rates/10<sup>5</sup> inhabitants – national health authorities data**

|             | 1985 or the<br>next later year | 1990 or the<br>next later year | 1995 or the<br>next later year | 1998              | Procedure                                                   | Data source                       |
|-------------|--------------------------------|--------------------------------|--------------------------------|-------------------|-------------------------------------------------------------|-----------------------------------|
| Australia   |                                |                                |                                | 117               | THR, partial hip<br>replacements and<br>revision procedures | Public and most private hospitals |
| Denmark     | 72                             | 121                            | 125                            | 146               | a)                                                          | National register                 |
| England     |                                | 115                            | 128                            | 137               | b)                                                          | Public hospitals *                |
| Finland     |                                | 109                            | 133                            | 145               | Hip replacements                                            | National register                 |
| France      |                                |                                |                                | 192               | c)                                                          | Public and private hospitals      |
| Hungary     |                                |                                | 57                             | 78 <sup>+</sup>   | d)                                                          | All hospitals                     |
| Ireland     |                                |                                | 110                            | 107               | e)                                                          | Public hospitals                  |
| New Zealand |                                |                                |                                | 80 <sup>§ °</sup> | Hip replacements                                            | Public hospitals                  |
| Norway      | 110                            | 131                            | 140                            | 145               | Primary and<br>revision THR <sup>†</sup>                    | National register                 |
| Poland      | 28                             | 31                             | 35                             |                   | g)                                                          | Central hospital register         |
| Portugal    |                                |                                | 41                             | 60 <sup>+</sup>   | Total and partial hip<br>replacements <sup>h)</sup>         | Public hospitals                  |
| Singapore   |                                |                                | 23                             | 27 <sup>+</sup>   | Hip implantations <sup>i)</sup>                             | All hospitals                     |

|               |     |     |     |                  |    |                       |
|---------------|-----|-----|-----|------------------|----|-----------------------|
| Sweden        | 129 | 127 | 136 | 151              | j) | National register     |
| United States |     |     | 99  | 102 <sup>#</sup> | e) | Non-federal hospitals |
| Wales         |     |     | 151 | 139              | b) | Public hospitals      |

---

+ 1999            § 1997            # 1996

\* [a](#) all patients admitted to NHS hospitals, including private patients treated in NHS Hospitals

° standardised discharge ratio (ratio of observed to expected discharge rates - age/gender standardised) of pacific people vs. total population: 0.3

- a) 1998: NFB, NFC Nomesco classification of surgical procedures  
1990/1995: 70030-39, 70230-39, 70130-39, 70330-39  
1985: 8270, 8274
- b) OPCS4: W37-W39, W46-W48
- c) W435-W454, W795
- d) International Classification of Procedures, WHO, 1978: 58150-58159, 5815A-F, 58169
- e) ICD-9-CM: 81.51, 81.52, 81.53
- f) Hemiprotheses not recorded
- g) 5-820
- h) ICD-9-CM: 81.51, 81.52
- i) Total and partial hip replacement, for hip revision procedures no detailed information available
- j) ICD-9: 8410, 8413-15, 8419, NFB0-4, NFB9, NFC
